# Supplementary material for: A series of magnon crystals appearing under ultrahigh magnetic fields in a kagomé antiferromagnet
Source: PubMed Central journal article supplement (PMC6420565; doi:10.1038/s41467-019-09063-7), 2019-03-15
Supplement: 41467_2019_9063_MOESM1_ESM.pdf [file 41467_2019_9063_MOESM1_ESM.pdf]

## **Supplementary Information**

A series of magnon crystals appearing under ultrahigh magnetic fields in a kagomé antiferromagnet

Okuma et al.,

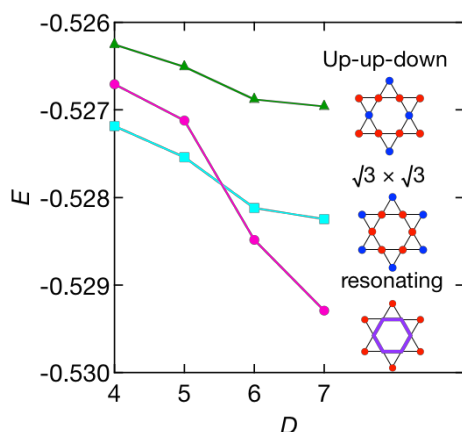

**Supplementary Figure 1** Energies at  $H = 1.1 J$  calculated by the PEPS method as a function of the bond dimension  $D$  for the three spin configurations expected at the  $1/3$  plateau. In the right side of the figure, the red and blue circles represent up and down spins, respectively, and the purple hexagon represents entangled 6 spins in the singlet state. In the up-up-down and  $\sqrt{3} \times \sqrt{3}$  states, each triangle consists of up, up and down spins with the triangles arranged in  $\mathbf{q} = 0$  and  $\sqrt{3} \times \sqrt{3}$ , respectively, while the resonating state contains a singlet hexagonal magnon. In the left side of the figure, Green triangles, sky blue squares, and violet circles represent the energies of  $\mathbf{q} = 0$ ,  $\sqrt{3} \times \sqrt{3}$ , and resonating structures, respectively. Among them, the resonating state finally yields lowest energy as the bond dimension increases.

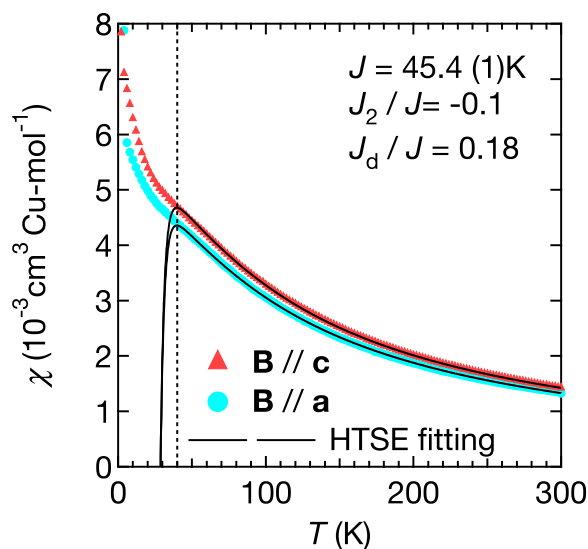

**Supplementary Figure 2** Magnetic susceptibility of CdK measured at  $B = 1$  T along the  $a$  (blue circles) and  $c$  (red triangles) axes. To estimate the magnitudes of  $J$ ,  $J_2$  and  $J_d$ , both the data above 40 K are simultaneously fitted to the 10th-order-high-temperature-series expansion<sup>45</sup>. The best fit is obtained at  $(J/K, J_2/J, J_d/J) = (45.4, -0.1, 0.18)$  with  $g_a = 2.28$  and  $g_c = 2.37$  and a common temperature-independent term  $\chi_0 = -6.65 \times 10^{-5} \text{ cm}^3 \text{ Cu-mol}^{-1}$ . It is noted that these values are approximate as they depend on the temperature region used; the available information from the data is rather limited. Kapellasite is an isostructural compound of CdK that features relative large  $J_d$  of 12 K and negligible  $J_2$ .

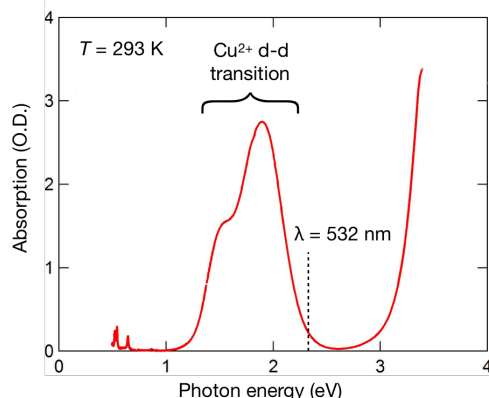

**Supplementary Figure 3** Optical absorption spectrum of CdK at room temperature. The red line represents the

observed absorption spectrum. The peak at 1.5–2 eV corresponds to the  $d-d$  transition ( $T_2 \rightarrow E$ ) of  $\text{Cu}^{2+}$ . Light with  $\lambda = 532$  nm from a Nd:YAG laser is employed for Faraday rotation measurements, which is located at the bottom of the  $d-d$  transition and thus non-linear effects on the Faraday rotation can be ignored.

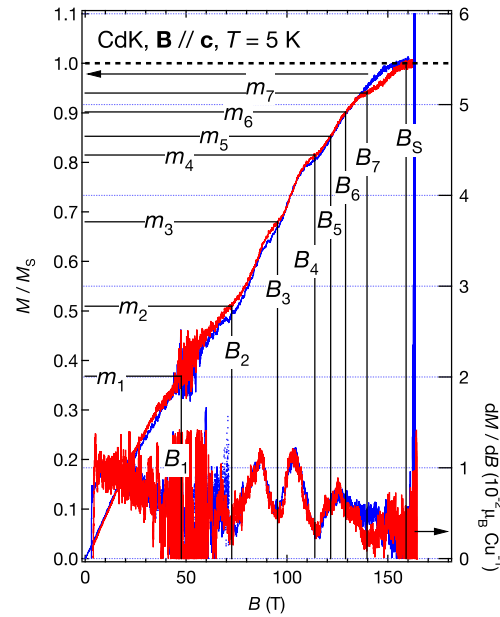

**Supplementary Figure 4 Comparison of two successive magnetization measurements with elevating (blue curves) and descending (red curves) magnetic field at 5 K. Anomalies associated with plateaus are observed at almost the same magnetic fields in the two curves. We analyse field-descending data in detail.**

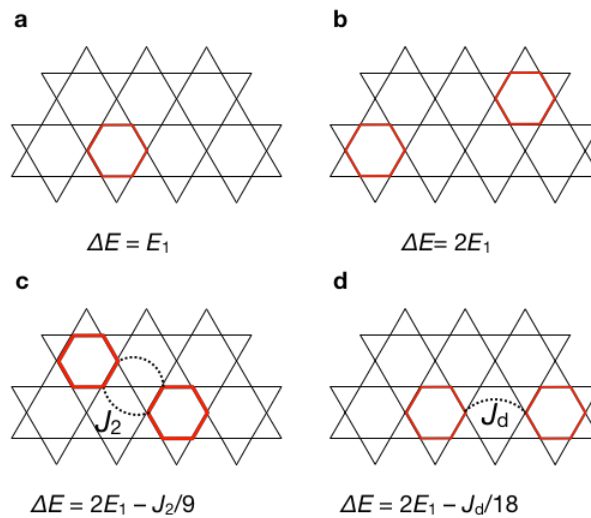

**Supplementary Figure 5 Comparison of energies for various magnon configurations.** We consider a  $J_1$ - $J_2$ - $J_d$  model in a magnetic field larger than saturation in which the fully polarized state is the ground state as a magnon vacuum with zero energy. **a** the formation of a single hexagonal magnon with  $S^z = 2$  costs  $\Delta E = E_1$ . **b**  $2E_1$  for two independent magnons without mutual interactions. **c** configuration of two nearby magnons expected for  $Q_{\text{mag}} = 9$ . They are connected by  $J_2$ .  $\Delta E$  is now  $2E_1 - J_2/9$ . **d** configuration of two nearby magnons for  $Q_{\text{mag}} = 12$  with a  $J_d$  coupling with  $\Delta E = 2E_1 - J_d/18$ . A simple argument reveals that antiferromagnetic  $J_2$  and  $J_d$  stabilize magnon configurations with  $Q_{\text{mag}} = 9$  and 12, respectively, while ferromagnetic interactions lead to destabilization. In CdK, all the configurations with  $Q_{\text{mag}} = 12$  are observed, while only on-site 3-magnon configuration with  $S^z = 0$  is observed for  $Q_{\text{mag}} = 9$ . This fact suggests ferromagnetic  $J_2$  and antiferromagnetic  $J_d$ . Magnon crystals with larger unit cells in high fields do not exhibit energy gain or loss by  $J_2$  or  $J_d$  and are considered to originate from higher order interactions. We have assigned 19/21 to  $m_6$ , not 32/36 and 10/12 to  $m_5$ , not 30/36 because adding another magnon to the same hexagon may cost a large on-site repulsion energy in the order of  $J$ : it is preferable to increase the density of single magnons as opposed to generating double or triple magnons of less density.

#### Supplementary References

1. Bernu, B., et al. Exchange energies of kapellasite from high-temperature series analysis of the kagome lattice  $J_1$ - $J_2$ - $J_d$ -Heisenberg model. *Phys. Rev. B* **87**, 155107 (2013).
2. Pustogow, A., et al. Nature of optical excitations in the frustrated kagome compound herbertsmithite. *Phys. Rev. B* **96**,

241114 (2017).
